# Supplementary material
Source: PubMed Central journal article supplement (PMC4012577)
Supplement: supp_pp.114.235564_235564rev_SUPP.pdf [file supp_pp.114.235564_235564rev_SUPP.pdf]

## Supplemental Data

### **OsmiR396d-regulated OsGRFs Function in Floral Organogenesis in Rice through Binding to their Targets *OsJMJ706* and *OsCR4***

Huanhuan Liu<sup>#</sup>, Siyi Guo<sup>#</sup>, Yunyuan Xu, Chunhua Li, Zeyong Zhang, Dajian Zhang, Shujuan Xu, Cui Zhang, Kang Chong\*

Key Laboratory of Plant Molecular Physiology, Institute of Botany, University of the Chinese Academy of Sciences, Beijing 100093, China (H. L., S. G., Y. X., C. L., Z. Z., D. Z., S. X., C. Z., K. C.); National center for Plant Gene Research (Beijing), Beijing 100093, China (K. C.)

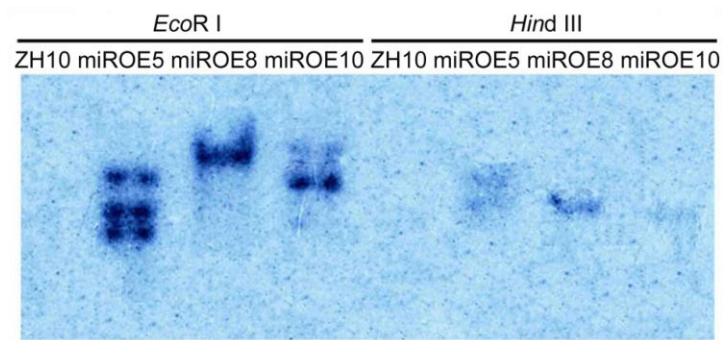

**Supplemental Figure S1.** Southern blot assay of miROE transformed rice plants. Southern blot assay of genomic DNA isolated from wild type and miROE transformed plants were digested with *EcoR* I or *Hind* III. The blot was hybridized with the open reading frame of the *GUS* gene labeled with  $\alpha$ -<sup>32</sup>P-dCTP. ZH10, miROE5, miROE8 and miROE10 representing zhonghua10, overexpression (OE) lines of OsmiR396d transgenic rice, respectively.

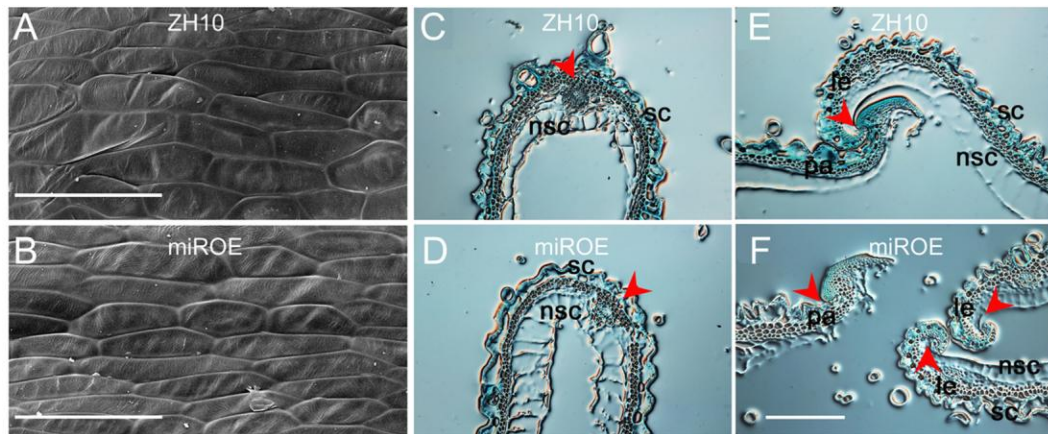

**Supplemental Figure S2.** Phenotypic analysis of floret inner organs in miROE8 and ZH10. A to B, SEM analysis of the surfaces of lodicules in ZH10 and miROE plants. Scale bars = 50  $\mu\text{m}$ . C to D, Transverse section of lemma of florets in ZH10 and miROE plants. (Red arrowheads indicate the vascular bundles). E to F, Transverse sections of the interlocking regions of florets in ZH10 and miROE plants. (Red arrowheads indicate the interlocking region in E or the self-fusion region in F of the palea and lemma). Scale bars = 200  $\mu\text{m}$  in C to F.

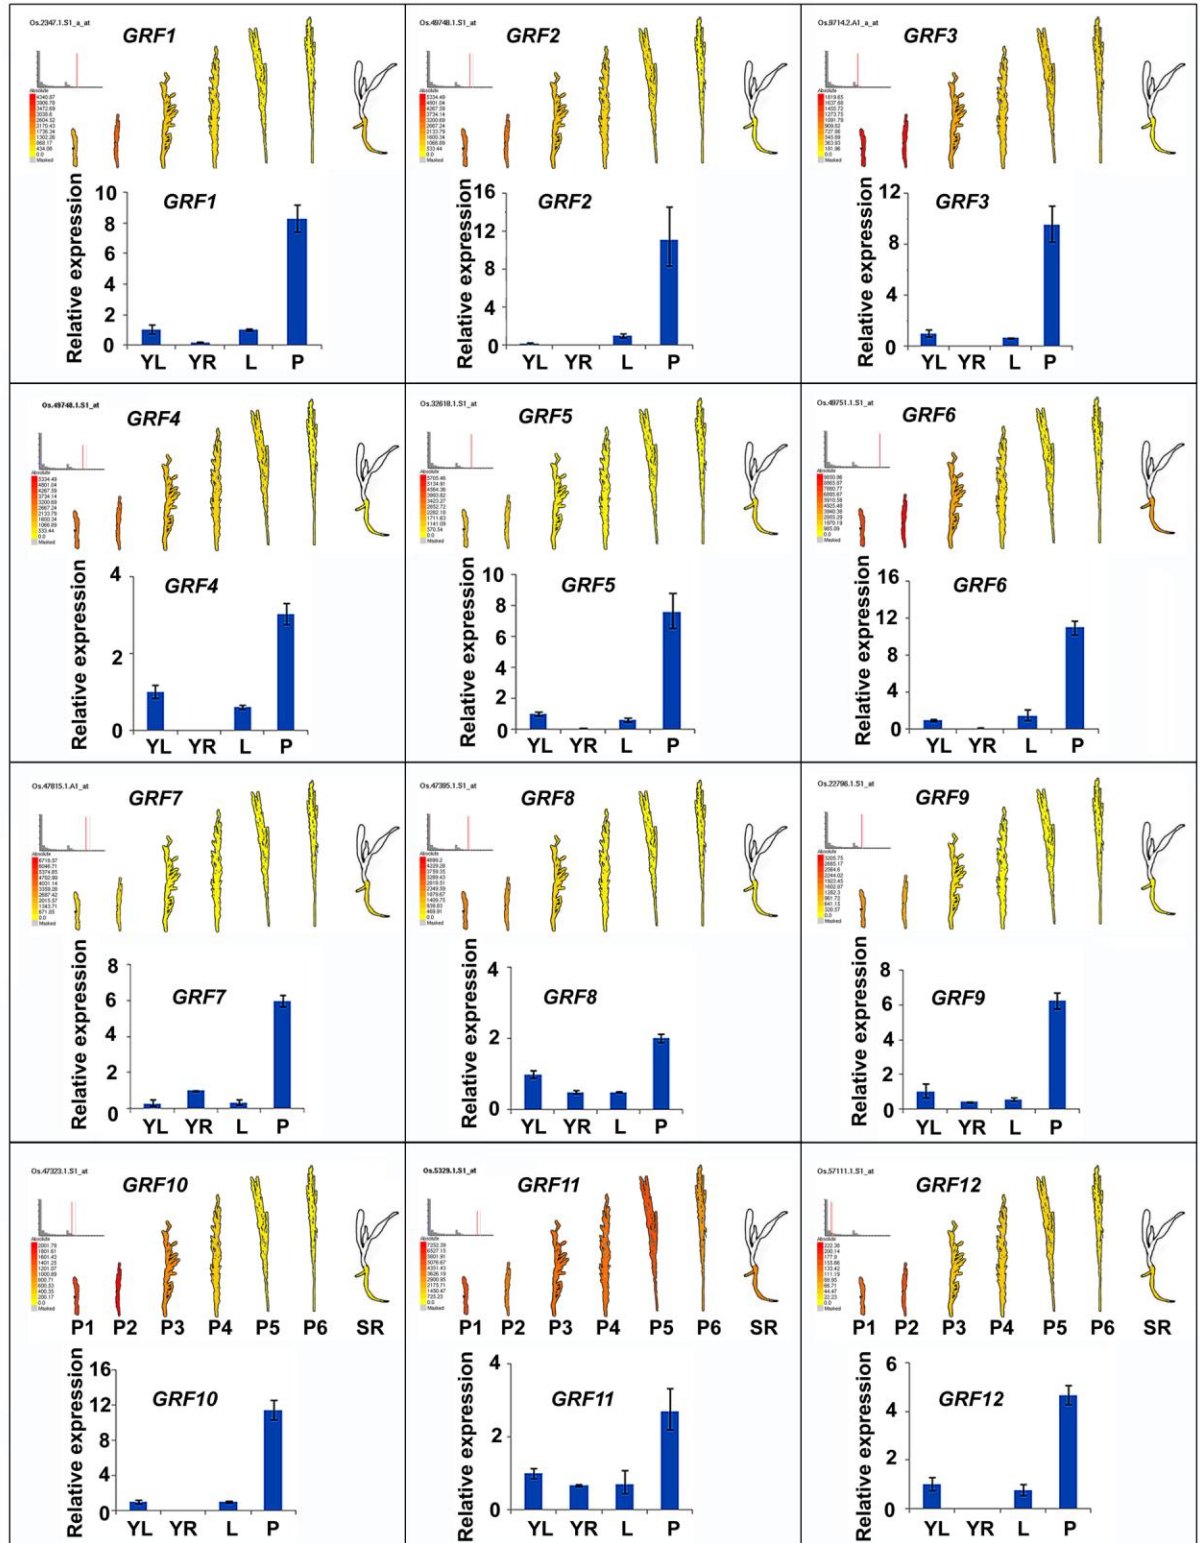

**Supplemental Figure S3.** Expression patterns of *OsGRF* genes in different tissues. Relative expression levels of *OsGRF* genes based on microarray data displayed in the eFP browser (<http://bar.utoronto.ca/efprice/cgi-bin/efpWeb.cgi>) in Young Inflorescence (P1), Inflorescence (P2), Inflorescence (P3), Inflorescence (P4), Inflorescence (P5), Inflorescence (P6) and

Seedling Root (ST). Color scale shows the microarray signal level. The expression levels of *OsGRF* genes were also detected by RT-Q-PCR in various organs, including Young Leaf (YL), Young Root (YR), leaves (L) and Young panicles (P). Values are means  $\pm$ SD of three independent experiments.

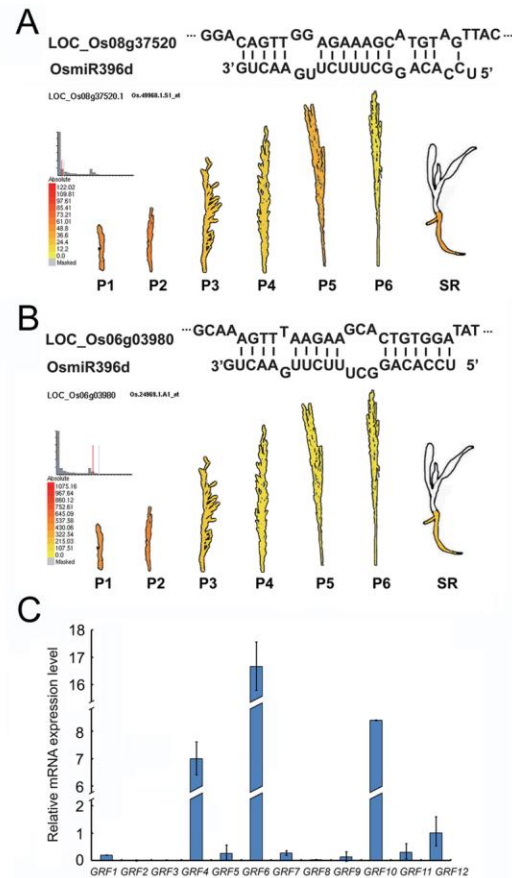

**Supplemental Figure S4.** Expression patterns of predicted targets of OsmiR396d and *OsGRF* genes. Expression pattern analysis of two predicated target genes of OsmiR396d are processed by rice eFP browser (<http://bar.utoronto.ca/efprice/cgi-bin/efpWeb.cgi>) and *OsGRF* genes in young inflorescence of ZH10 by RT-Q-PCR. A to B, Expression pattern analysis of two predicated target genes of OsmiR396d by rice eFP browser. C, Relative expression levels of *OsGRF* genes with Q-RT-PCR in young inflorescence of wild type ZH10, expression level of *OsGRF12* was set as 1. Values are means  $\pm$  SD of three independent experiments.

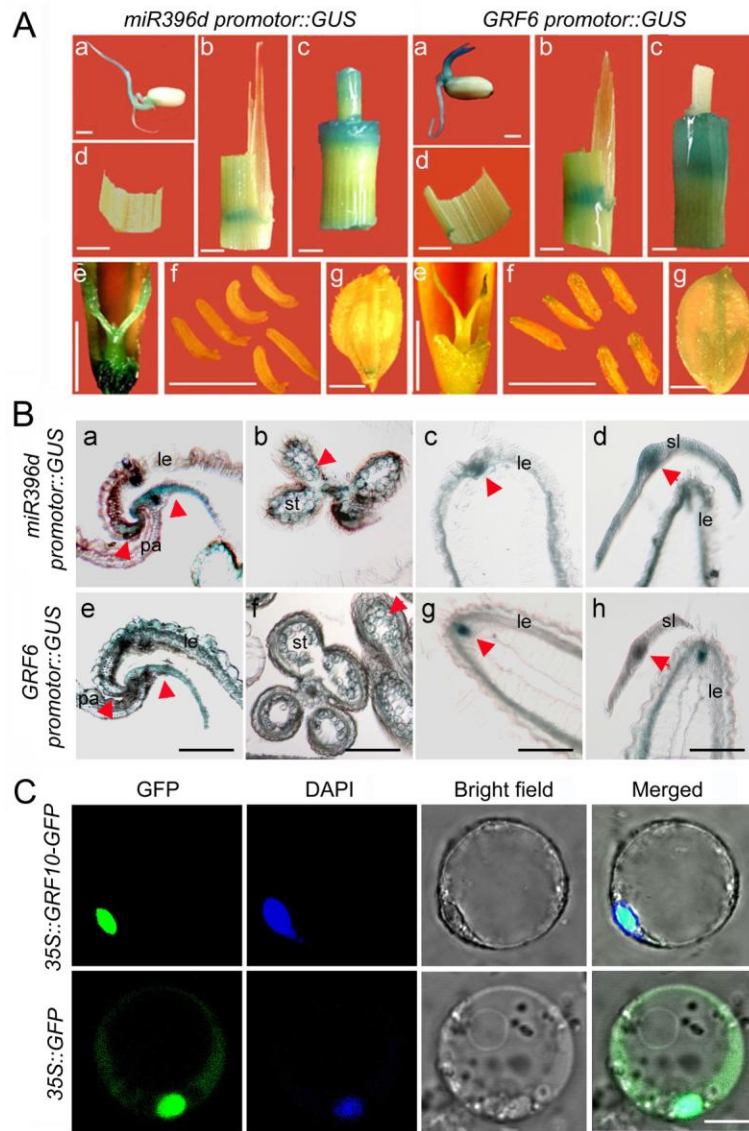

**Supplemental Figure S5.** Expression pattern of OsmiR396d and its target genes. A, *pOsmiR396d promoter::GUS* and *pOsGRF6 promoter::GUS* expression patterns are shown as GUS staining. (a), Seeds after germinating for 3 days; (b), Pulvinus; (c), Node; (d), Mature leaf; (e), pistil and lodicules; (f), stamens; (g), Old floret. Bars = 2 mm. B, Sections of GUS staining florets in *pOsmiR396d promoter::GUS* and *pOsGRF6 promoter::GUS* plants. Red arrow heads in a-d or e-h indicates the interlocking region of palea and lemma; pollens; the vascular bundles of the lemma and sterile lemma respectively. Pa: palea, le: lemma, st: stamen, sl: sterile lemma. Scale bars = 100  $\mu$ m. C, Subcellular localization of OsGRF10-GFP in rice leaf protoplast, *35S::GFP* was used as a control. Bar = 10  $\mu$ m.

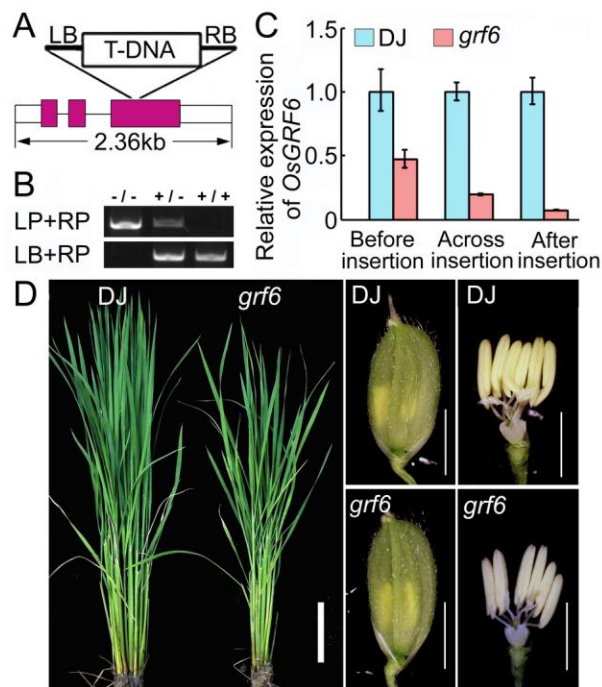

**Supplemental Figure S6.** Molecular identification of *osgrf6* mutant.

A, Scheme representing the *osgrf6* mutant. B, Genomic identification of the *osgrf6* mutant. DJ (DongJin *-/-*) is the wild type and *+/+* indicates the homozygous mutant. C, Relative expression levels of *OsGRF6* gene before the insertion site, across the insertion site and after the insertion site in DJ (DongJin) and *osgrf6*. Values are means  $\pm$  SD of three independent experiments. D, Plants of *osgrf6* mutant and the DJ wild type plants (Scale bar = 20 cm) as well as their florets before flowering (Scale bars = 3 mm).



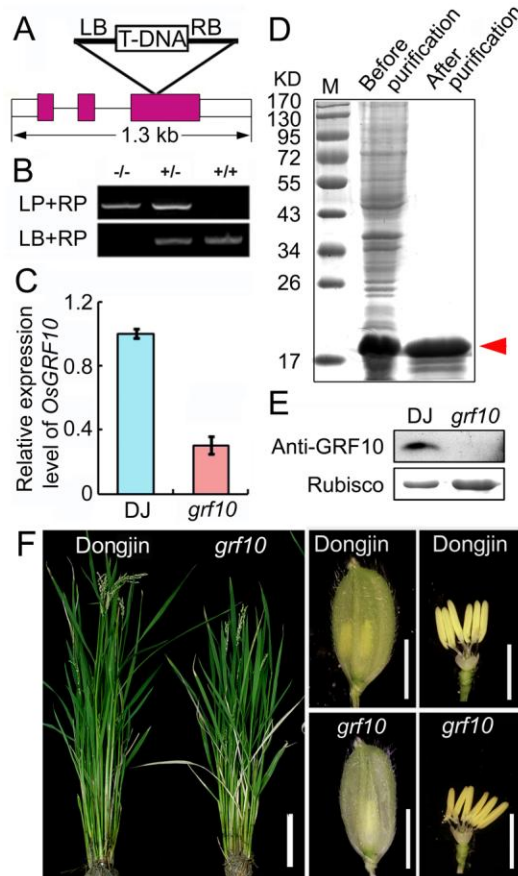

**Supplemental Figure S7.** Molecular identification of *osgrf10* mutant. A, Scheme representing the *osgrf10* mutant. B, Genomic identification of the *osgrf10* mutant. C, Expression level of *OsGRF10* was detected in *osgrf10* and Dongjin wild type. Values are means  $\pm$ SD of three independent experiments. D, OsGRF10-His protein was expressed in *E. coli* and purified. The red head indicates the purified OsGRF10-His protein. E, Expression levels of OsGRF10 protein were detected in *osgrf10* and Dongjin wild type plants. The rubisco was used as the loading control. F, Plants of *osgrf10* mutant and the DJ wild type plants (Scale bar = 20 cm) as well as the florets before flowering (Scale bars = 3 mm).

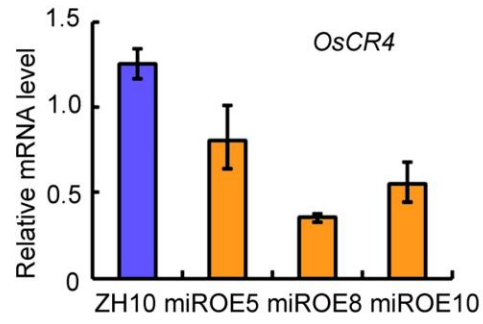

**Supplemental Figure S8.** Expression levels of *OsCR4* were detected in young spikelets. Values are means  $\pm$ SD of three independent experiments.

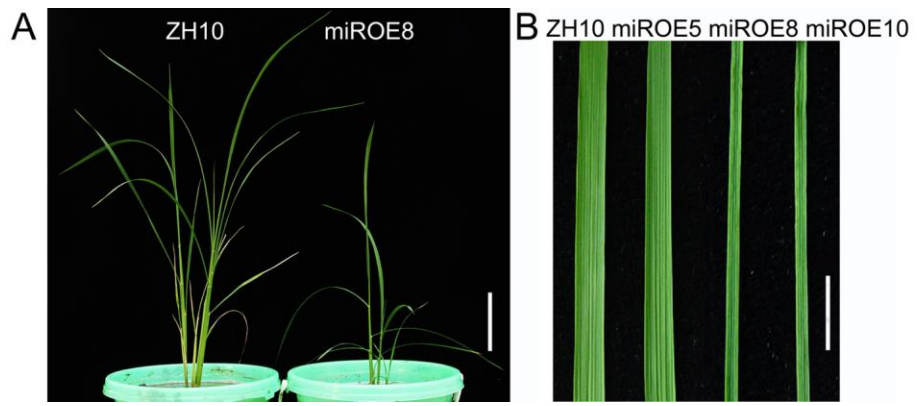

**Supplemental Figure S9.** Small leaves were occasionally found in miROE plants. Bars = 10 cm in A and 1 cm in B.

**Supplemental Table S1.** Microarray analysis of OsmiR396d OE plants. (Down-regulated genes with  $|\log_2 \text{ratio}| \geq 2$ . P value is showed as  $\log_2$  of fold change value.)

| <b>Locus<sup>a</sup></b> | <b>Description<sup>b</sup></b>                                                  | <b>Fold Change (<math>\log_2</math>)<sup>c</sup></b> |
|--------------------------|---------------------------------------------------------------------------------|------------------------------------------------------|
| LOC_Os01g45914           | expressed protein                                                               | -5.9                                                 |
| LOC_Os02g43370           | transposon protein, putative, unclassified, expressed                           | -4.7                                                 |
| LOC_Os03g03724           | expressed protein                                                               | -4.5                                                 |
| LOC_Os07g34520           | isocitrate lyase, putative, expressed                                           | -3.8                                                 |
| LOC_Os03g59330           | polygalacturonase, putative, expressed                                          | -3.4                                                 |
| LOC_Os06g38980           | polyadenylate-binding protein, putative, expressed                              | -3.4                                                 |
| LOC_Os08g38810           | BURP domain containing protein, expressed                                       | -3.4                                                 |
| LOC_Os08g43290           | LTPL44, Protease inhibitor/seed storage/LTP family protein precursor, expressed | -3.3                                                 |
| LOC_Os01g57599           | retrotransposon protein, putative, unclassified, expressed                      | -3.2                                                 |
| LOC_Os05g15300           | expressed protein                                                               | -3.2                                                 |
| LOC_Os10g38050           | HOTHEAD precursor, putative, expressed                                          | -3.2                                                 |
| LOC_Os05g07060           | fasciclin domain containing protein, expressed                                  | -3.1                                                 |
| LOC_Os02g30910           | nodulin MtN3 family protein, putative, expressed                                | -3                                                   |
| LOC_Os01g65690           | 4,5-DOPA dioxygenase extradiol, putative, expressed                             | -2.9                                                 |
| LOC_Os01g66700           | beta-hexosaminidase precursor, putative, expressed                              | -2.9                                                 |
| LOC_Os05g06670           | gibberellin 2-oxidase, putative, expressed                                      | -2.9                                                 |
| LOC_Os09g21370           | cysteine proteinase EP-B 1 precursor, putative, expressed                       | -2.9                                                 |
| LOC_Os04g33080           | protein phosphatase 2C, putative, expressed                                     | -2.8                                                 |
| LOC_Os08g05820           | monocopper oxidase, putative, expressed                                         | -2.8                                                 |
| LOC_Os09g08190           | sulfotransferase domain containing protein, expressed                           | -2.8                                                 |
| LOC_Os01g65100           | peptide transporter, putative, expressed                                        | -2.7                                                 |
| LOC_Os03g32490           | DUF1230 domain containing protein, expressed                                    | -2.7                                                 |
| LOC_Os05g31670           | AWPM-19-like membrane family protein, putative, expressed                       | -2.7                                                 |
| LOC_Os06g13390           | SAM dependent carboxyl methyltransferase, putative, expressed                   | -2.7                                                 |
| LOC_Os07g14600           | hydrolase, putative, expressed                                                  | -2.7                                                 |
| LOC_Os08g03682           | cytochrome P450, putative, expressed                                            | -2.7                                                 |

|                |                                                                                   |      |
|----------------|-----------------------------------------------------------------------------------|------|
| LOC_Os08g38170 | putative, expressed                                                               | -2.7 |
| LOC_Os03g53900 | universal stress protein domain containing protein, putative, expressed           | -2.6 |
| LOC_Os04g33920 | LTPL102 - Protease inhibitor/seed storage/LTP family protein precursor, expressed | -2.6 |
| LOC_Os05g48300 | purine permease, putative, expressed                                              | -2.6 |
| LOC_Os09g30320 | BURP domain containing protein, expressed                                         | -2.6 |
| LOC_Os02g52040 | phosphate-induced protein 1 conserved region domain containing protein, expressed | -2.5 |
| LOC_Os09g35800 | UDP-glucose 4-epimerase, putative, expressed                                      | -2.5 |
| LOC_Os11g47580 | glycosyl hydrolase, putative, expressed                                           | -2.5 |
| LOC_Os04g25440 | cytokinin-O-glucosyltransferase 2, putative, expressed                            | -2.3 |
| LOC_Os07g48550 | no apical meristem protein, putative, expressed                                   | -2.3 |
| LOC_Os01g46120 | GDSL-like lipase/acylhydrolase, putative, expressed                               | -2.2 |
| LOC_Os03g61270 | OsMan04 - Endo-Beta-Mannanase, expressed                                          | -2.2 |
| LOC_Os04g15920 | dehydrogenase, putative, expressed                                                | -2.2 |
| LOC_Os04g44600 | CRP1 - Cysteine-rich family protein precursor, expressed                          | -2.2 |
| LOC_Os05g09740 | HAD superfamily phosphatase, putative, expressed                                  | -2.2 |
| LOC_Os07g30640 | ubiquitin fusion protein, putative, expressed                                     | -2.2 |
| LOC_Os08g38170 | methyladenine glycosylase, putative, expressed                                    | -2.2 |
| LOC_Os10g39770 | zinc finger, C3HC4 type, domain containing protein, expressed                     | -2.2 |
| LOC_Os11g02054 | ACT domain containing protein, expressed                                          | -2.2 |
| LOC_Os01g21120 | AP2 domain containing protein, expressed                                          | -2.1 |
| LOC_Os01g46720 | expressed protein                                                                 | -2.1 |
| LOC_Os01g48710 | heavy metal-associated domain containing protein, expressed                       | -2.1 |
| LOC_Os01g52130 | sulfate transporter, putative, expressed                                          | -2.1 |
| LOC_Os02g17620 | isochorismatase family protein, putative, expressed                               | -2.1 |
| LOC_Os02g35770 | homeobox associated leucine zipper, putative, expressed                           | -2.1 |
| LOC_Os02g47660 | basic helix-loop-helix, putative, expressed                                       | -2.1 |
| LOC_Os03g54000 | oligopeptide transporter, putative, expressed                                     | -2.1 |
| LOC_Os04g14680 | OsAPx3 - Peroxisomal Ascorbate Peroxidase encoding gene 5,8, expressed            | -2.1 |

|                       |                                                                  |             |
|-----------------------|------------------------------------------------------------------|-------------|
| LOC_Os05g27350        | hypothetical protein                                             | -2.1        |
| LOC_Os05g50080        | zinc finger C-x8-C-x5-C-x3-H type family protein, expressed      | -2.1        |
| LOC_Os01g22352        | peroxidase precursor, putative, expressed                        | -2          |
| LOC_Os01g50750        | zinc finger, C3HC4 type domain containing protein, expressed     | -2          |
| LOC_Os02g33060        | expressed protein                                                | -2          |
| LOC_Os02g48710        | expressed protein                                                | -2          |
| LOC_Os03g58350        | OsIAA14 - Auxin-responsive Aux/IAA gene family member, expressed | -2          |
| LOC_Os04g28620        | male sterility protein, putative, expressed                      | -2          |
| LOC_Os05g48850        | no apical meristem protein, putative, expressed                  | -2          |
| LOC_Os06g38960        | expressed protein                                                | -2          |
| <b>LOC_Os10g42690</b> | <b>jmjC domain containing protein, expressed</b>                 | <b>-0.3</b> |

a TIGR locus number.

b Gene annotation in the TIGR database.

c Fold change of the OsmiR396d OE plants compared with the wild type. Value is showed as  $\log_2$  of fold change value.

**Supplemental Table S2.** Microarray analysis of OsmiR396d OE plants. (Up-regulated genes with  $|\log_2 \text{ratio}| \geq 2$ . P value is showed as  $\log_2$  of fold change value.)

| <b>Locus<sup>a</sup></b> | <b>Description<sup>b</sup></b>                                                    | <b>Fold Change (<math>\log_2</math>)<sup>c</sup></b> |
|--------------------------|-----------------------------------------------------------------------------------|------------------------------------------------------|
| LOC_Os10g11580           | histone-like transcription factor and archaeal histone, putative, expressed       | 6.4                                                  |
| LOC_Os10g40430           | LTPL139 - Protease inhibitor/seed storage/LTP family protein precursor, expressed | 5.6                                                  |
| LOC_Os01g60640           | OsWRKY21 - Superfamily of TFs having WRKY and zinc finger domains, expressed      | 5.4                                                  |
| LOC_Os07g18680           | retrotransposon, putative, centromere-specific                                    | 4.8                                                  |
| LOC_Os06g06490           | U-box domain containing heat shock protein, putative, expressed                   | 4.7                                                  |
| LOC_Os06g11830           | hAT dimerisation domain-containing protein, putative,                             | 4.7                                                  |

|                |                                                                              |     |
|----------------|------------------------------------------------------------------------------|-----|
|                | expressed                                                                    |     |
| LOC_Os06g39240 | endothelial differentiation-related factor 1, putative, expressed            | 4.6 |
| LOC_Os05g44340 | heat shock protein 101, putative, expressed                                  | 4.5 |
| LOC_Os11g31060 | IQ calmodulin-binding and BAG domain containing protein, putative, expressed | 4.2 |
| LOC_Os01g03680 | BBTI8, Bowman-Birk type bran trypsin inhibitor precursor, expressed          | 4.1 |
| LOC_Os10g26910 | transposon protein, putative, CACTA, En/Spm sub-class                        | 3.9 |
| LOC_Os06g31930 | thionin precursor protein, putative, expressed                               | 3.5 |
| LOC_Os03g52860 | lipoygenase, putative, expressed                                             | 3.4 |
| LOC_Os03g49430 | pre-mRNA-splicing factor, putative, expressed                                | 3.3 |
| LOC_Os05g48810 | dnaJ domain containing protein, expressed                                    | 3.3 |
| LOC_Os03g03980 | coiled-coil domain-containing protein 124, putative, expressed               | 3.1 |
| LOC_Os11g37960 | WIP4 - Wound-induced protein precursor, expressed                            | 3   |
| LOC_Os02g07630 | copper-transporting ATPase, putative, expressed                              | 2.9 |
| LOC_Os10g34930 | secretory protein, putative, expressed                                       | 2.9 |
| LOC_Os04g44460 | sulfotransferase domain containing protein, expressed                        | 2.9 |
| LOC_Os11g38260 | PAP fibrillin family domain containing protein, expressed                    | 2.8 |
| LOC_Os08g34249 | inhibitor I family protein, putative                                         | 2.8 |
| LOC_Os08g27870 | EARLY flowering protein, putative                                            | 2.7 |
| LOC_Os04g34490 | nodulin, putative, expressed                                                 | 2.6 |
| LOC_Os01g55270 | SGS domain containing protein, expressed                                     | 2.6 |
| LOC_Os04g01874 | protein kinase, putative, expressed                                          | 2.5 |
| LOC_Os05g06920 | relA-SpoT like protein RSH4, putative, expressed                             | 2.5 |
| LOC_Os08g36340 | potassium transporter, putative, expressed                                   | 2.5 |
| LOC_Os02g56900 | thioredoxin family protein, putative, expressed                              | 2.4 |
| LOC_Os10g28340 | heat stress transcription factor, putative, expressed                        | 2.4 |
| LOC_Os03g57340 | chaperone protein dnaJ, putative, expressed                                  | 2.4 |
| LOC_Os07g03840 | lectin-like receptor kinase, putative, expressed                             | 2.3 |
| LOC_Os10g03050 | leucine-rich repeat receptor protein kinase EXS precursor, putative          | 2.3 |
| LOC_Os04g48030 | heat stress transcription factor B-1, putative, expressed                    | 2.2 |

|                |                                                                         |     |
|----------------|-------------------------------------------------------------------------|-----|
| LOC_Os06g32600 | THION15 - Plant thionin family protein precursor, expressed             | 2.2 |
| LOC_Os04g13220 | ABC transporter family protein, putative, expressed                     | 2.2 |
| LOC_Os11g36160 | receptor-like protein kinase 2 precursor, putative, expressed           | 2.1 |
| LOC_Os01g20160 | OsHKT1;5 - Na <sup>+</sup> transporter, expressed                       | 2.1 |
| LOC_Os09g36700 | ribonuclease T2 family domain containing protein, expressed             | 2.1 |
| LOC_Os05g01444 | polygalacturonase inhibitor precursor, putative, expressed              | 2   |
| LOC_Os01g14410 | early light-induced protein, chloroplast precursor, putative, expressed | 2   |
| LOC_Os01g03310 | BBTI1 - Bowman-Birk type bran trypsin inhibitor precursor, expressed    | 2   |
| LOC_Os01g35330 | circumsporozoite protein precursor, putative, expressed                 | 2   |

a TIGR locus number.

b Gene annotation in the TIGR database.

c Fold change of the OsmiR396d OE compared with the wild type. Value is showed as log<sub>2</sub> of fold change value.

**Supplemental Table S3.** Primers used in this work.

| Experiment     | Primer name         | Sequence                     |
|----------------|---------------------|------------------------------|
| Q-PCR analysis | <i>Ubi</i> RT F:    | 5'-AACCAGCTGAGGCCCAAGA-3'    |
|                | <i>Ubi</i> RT R:    | 5'-AACCAGTCCATGAACCCGG-3'    |
|                | <i>OsGIF1</i> RT F: | 5'-CCACCGAGCAGATCCAAAAG-3'   |
|                | <i>OsGIF1</i> RT R: | 5'-GAGCACATTCAGCCAACCTCC-3'  |
|                | <i>OsGRF1</i> RTP1: | 5'-GCGTACCCGGACTCCAAGTA-3'   |
|                | <i>OsGRF1</i> RTP2: | 5'-CAAGGACATTTCCACAGGCTTT-3' |
|                | <i>OsGRF2</i> RTP1: | 5'-GCGTACGGCGAGTCCAAGTA-3'   |
|                | <i>OsGRF2</i> RTP2: | 5'-GGGCGGCATTTCCACAG-3'      |
|                | <i>OsGRF3</i> RTP1: | 5'-ACTCGCCTCGCGCTTCTAC-3'    |
|                | <i>OsGRF3</i> RTP2: | 5'-TCCGGGCTCCGGGT-3'         |
|                | <i>OsGRF4</i> RTP1: | 5'-ATTCCAAGTACTGCGAGCGC-3'   |
|                | <i>OsGRF4</i> RTP2: | 5'-GGCGACCAGCTGCGTTT-3'      |
|                | <i>OsGRF5</i> RTP1: | 5'-ACTCCAAGTACTGCGAGCGC-3'   |
|                | <i>OsGRF5</i> RTP2: | 5'-GGGCAGCGGTCTTGATT-3'      |



|      |                       |                                                              |
|------|-----------------------|--------------------------------------------------------------|
|      | <i>OsGRF6</i> RTP1:   | 5'-CGGACGGACGGCAAG-3'                                        |
|      | <i>OsGRF6</i> RTP2:   | 5'-GGTTCATGTGTGCTCACAG-3'                                    |
|      | <i>OsGRF7</i> RTP1:   | 5'-AAGTACTGCGAGCGGCACATA-3'                                  |
|      | <i>OsGRF7</i> RTP2:   | 5'-AGATTGGCCTTCCACATGCT-3'                                   |
|      | <i>OsGRF8</i> RTP1:   | 5'-TTGTGAGCGACACATAAACCG-3'                                  |
|      | <i>OsGRF8</i> RTP2:   | 5'-GCAATGGTGAGTGTCGCCTT-3'                                   |
|      | <i>OsGRF9</i> RTP1:   | 5'-CACATCAACAGAAACCGCCA-3'                                   |
|      | <i>OsGRF9</i> RTP2:   | 5'-CAGCACACGGTGTCTCTTTTAC-3'                                 |
|      | <i>OsGRF10</i> RT P1: | 5'-ACAAGGCGACGGCGC-3'                                        |
|      | <i>OsGRF10</i> RT P2: | 5'-GCGAAGTAGCGGTAGATGAGC-3'                                  |
|      | <i>OsGRF11</i> RT P1: | 5'-GGAAGAGTGTTACTGGTGCATCT-3'                                |
|      | <i>OsGRF11</i> RT P2: | 5'-AGTCCAAGCAGAGTGTGCC-3'                                    |
|      | <i>OsGRF12</i> RT P1: | 5'-GGCCGTTCAAGAAAGCCTATG-3'                                  |
|      | <i>OsGRF12</i> RT P2: | 5'-GGACCGGGAGATATGTGGG-3'                                    |
|      | <i>GRF6-as</i> RT p1: | 5'-GCCTGGTGTGAGCTTCTTGAT-3'                                  |
|      | <i>GRF6-as</i> RT p2: | 5'-TGAATCGTTTCCTCATGCCTG-3'                                  |
|      | <i>JMJ706</i> RT P1:  | 5'-GTCCGACCAAAGCGACTGAA-3'                                   |
|      | <i>JMJ706</i> RT P2:  | 5'-GCTCAACCACTCTGTTCGTGC-3'                                  |
|      | <i>MADS47</i> RT P1:  | 5'-TGCACAGGCTGAATGTGGAA-3'                                   |
|      | <i>MADS47</i> RT P2:  | 5'-CCTAGACCGGACTCGAGGCT-3'                                   |
|      | <i>DH1</i> RT P1:     | 5'-GCGATGATGAGATCAACCTCC-3'                                  |
|      | <i>DH1</i> RT P2:     | 5'-CAAAGCGTTGCATTGTTGATTT-3'                                 |
|      | <i>CR4</i> RTP1:      | 5'-GGAAATCCTCGGCATCTGAA-3'                                   |
|      | <i>CR4</i> RTP2:      | 5'-TCCCAACGTTCCCTTCCATCT-3'                                  |
|      | 396d stem-loop:       | 5'-GTCTCCTCTGGTGCAGGGTCCGAG<br>GTATTCGCACCAGAGGAGACMAGTTC-3' |
|      | 396 stem loop P1:     | 5'-GGCGGTCCACAGGCTTTCTT-3'                                   |
|      | 396 stem loop p2:     | 5'-TGGTGCAGGGTCCGAGGTATT-3'                                  |
|      | U6 P1:                | 5'-GGGACATCCGATAAAATTGGAA-3'                                 |
|      | U6 P2:                | 5'-CGATTTGTGCGTGCATCCTT-3'                                   |
| ChIP | <i>JMJ706</i> a p1:   | 5'-CCAATTCATACAAACCGTTGGTG-3'                                |
|      | <i>JMJ706</i> a p2:   | 5'-TGTGCAAATCTGGGAAGGC-3'                                    |
|      | <i>JMJ706</i> b p1:   | 5'-TGACTTGGTTGGGACTTGCC-3'                                   |
|      | <i>JMJ706</i> b p2:   | 5'-AGAGTGAACAAGCACCAACGG-3'                                  |
|      | <i>JMJ706</i> c p1:   | 5'-TCTGACCACGTCCAGTCCAC-3'                                   |
|      | <i>JMJ706</i> c p2:   | 5'-AATGTAGGGCCTTGGAAAGAGAAA-3'                               |
|      | <i>JMJ706</i> d p1:   | 5'-CTAATTTGGCCCCGGGTC-3'                                     |

|                          |                      |                                      |
|--------------------------|----------------------|--------------------------------------|
|                          | <i>JMJ706</i> d p2:  | 5'-TTGTGGCCCGGTCTAAGGTA-3'           |
|                          | <i>CR4</i> a p1:     | 5'-GCTGTTGCAAAGGTGGAGGA-3'           |
|                          | <i>CR4</i> a p2:     | 5'-GTGGAAGCATAACAATCCCCAAT-3'        |
|                          | <i>CR4</i> b p1:     | 5'-GCAAAAGGCGAAGGTGAGAG-3'           |
|                          | <i>CR4</i> b p2:     | 5'-GCGATGGTAAATGGGAGAATTG-3'         |
|                          | <i>CR4</i> c p1:     | 5'-TTGTTGCGTAAACCGTATTTCTGT-3'       |
|                          | <i>CR4</i> c p2:     | 5'-GGGATTCAGATGATGCAGGA-3'           |
| EMSA                     | <i>JMJ706</i> P1P1:  | 5'-CACTCTGCTGTCTCTGTTGGTCAATGCCAC-3' |
|                          | <i>JMJ706</i> P1P2:  | 5'-GTGGCATTGACCAACAGAGACAGCAGAGTG-3' |
|                          | <i>JMJ706</i> M1P1:  | 5'-CACTCTGCTGTCTGGGAAGGTCAATGCCAC-3' |
|                          | <i>JMJ706</i> M1P2:  | 5'-GTGGCATTGACCTTCCCAGACAGCAGAGTG-3' |
|                          | <i>JMJ706</i> M2P1:  | 5'-CACTCTGCTGTCTCCCCCGGTCAATGCCAC-3' |
|                          | <i>JMJ706</i> M2P2:  | 5'-GTGGCATTGACCGGGGGAGACAGCAGAGTG-3' |
|                          | <i>CR4</i> P1P1:     | 5'-TAACCGTATTTCTGTAAAATCCCGTG-3'     |
|                          | <i>CR4</i> P1P2:     | 5'-CACGGGATTTTAACAGAAATACGGTTA-3'    |
| Subcellular localization | <i>OsGRF6</i> P1:    | 5'-GC TCTAGA ATGCAGGGTGCAATG-3'      |
|                          | <i>OsGRF6</i> P2:    | 5'-GG GGTACC CACCAGGCGGATGC-3'       |
|                          | <i>OsGRF10</i> P1:   | 5'-TGCTCTAGA ATGGATGAGGAGAAG-3'      |
|                          | <i>OsGRF10</i> P2:   | 5'-GGGGTACC GGTGGCGCGCGCGG-3'        |
| Mutant identify          | 2715 LB:             | 5'-TTGGGGTTTCTACAGGACGTAAC-3'        |
|                          | <i>OsGRF6</i> MT LP: | 5'-TCGCTATCAACCATCAGCAC-3'           |
|                          | <i>OsGRF6</i> MT RP: | 5'-AAAACCTCTCCAATGGTCC-3'            |
|                          | 2707-LB:             | 5'-GGTGAATGGCATCGTTTGAA-3'           |
|                          | <i>GRF10</i> LP :    | 5'-TCATTCCTCTTCCCACCAAG-3'           |
|                          | <i>GRF10</i> RP :    | 5'-ACGGTGAGAATTGTTTTGCC-3'           |
| Luciferase and GUS assay | <i>OsGIF1</i> P1:    | 5'-TCCCCCGGGGATGCAGCAGCAGATG-3'      |
|                          | <i>OsGIF1</i> P2:    | 5'-GCGTCGACGGATTGATCGCCG-3'          |
|                          | <i>OsGIF2</i> p1:    | 5'-TCCCCCGGGGATGCAGCAGCAGCCG-3'      |
|                          | <i>OsGIF2</i> p2:    | 5'-GCGTCGACGGATTGATCGCC-3'           |
|                          | <i>OsGRF6</i> P1:    | 5'-TCCCCCGGGGATGCAGGGTCAATGGC-3'     |
|                          | <i>OsGRF6</i> P2:    | 5'-GCGTCGACCACCAGGCGGATGC-3'         |

|                                  |                            |                                                  |
|----------------------------------|----------------------------|--------------------------------------------------|
|                                  | <i>OsGRF10</i> p1:         | 5 ′TCCCCCGGGGATGGATGAGGAGAAG-3 ′                 |
|                                  | <i>OsGRF10</i> P2:         | 5 ′GCGTCGACGGTGGCGCGCGGGT GCC-3 ′                |
|                                  | <i>JMJ706</i> promoter P1: | 5 ′CCCAAGCTTACGACACGACACCACACG-3 ′               |
|                                  | <i>JMJ706</i> promoter P2: | 5 ′AAA ACTGCAGTAGGTGTTTCTGCCCTCCAC<br>-3 ′       |
|                                  | <i>CR4</i> promoter P1:    | 5 ′AAA ACTGCAG<br>ATCCCAATGCAAGTATTCG-3 ′        |
|                                  | <i>CR4</i> promoter P2:    | 5 ′GAAGATCTTTCTTGAAACTTGGAGGGGTC-<br>3 ′         |
| RNA <i>in situ</i> hybridization | <i>T7-OsGRF6</i> -F1       | 5 ′TAATACGACTCACTATAGGGGAGAAGCTGATGTTGTCAC-3 ′   |
|                                  | <i>OsGRF6</i> -R1          | 5 ′GACTCCGATAGGCAATTC-3 ′                        |
|                                  | <i>OsGRF6</i> -F2          | 5 ′GAGAAGCTGATGTTGTCAC-3 ′                       |
|                                  | <i>T7-OsGRF6</i> -R2       | 5 ′TAATACGACTCACTATAGGGGACTCCGATAGGCAATTC-3 ′    |
|                                  | <i>T7-OsGRF10</i> -F1      | 5 ′TAATACGACTCACTATAGGGATGGATGAGGAGAAGGAAG-3 ′   |
|                                  | <i>OsGRF10</i> -R1         | 5 ′CATGAACGTCAGCGCCGTC-3 ′                       |
|                                  | <i>OsGRF10</i> -F2         | 5 ′ATGGATGAGGAGAAGGAAG-3 ′                       |
|                                  | <i>T7-OsGRF10</i> -R2      | 5 ′TAATACGACTCACTATAGGGCATGAACGTCAGCGCCGTC-3 ′   |
|                                  | <i>T7-JMJ706</i> -F1       | 5 ′TAATACGACTCACTATAGGGATGCAACAGGTGGAGGGC-3 ′    |
|                                  | <i>JMJ706</i> -R1          | 5 ′TAGAGCTGTGCCATTGTTAG-3 ′                      |
|                                  | <i>JMJ706</i> -F2          | 5 ′ATGCAACAGGTGGAGGGC-3 ′                        |
|                                  | <i>T7-JMJ706</i> -R2       | 5 ′TAATACGACTCACTATAGGGTAGAGCTGTGCCATTGTTAG-3 ′  |
|                                  | <i>T7-CR4</i> -F1          | 5 ′TAATACGACTCACTATAGGGATGGACATTGTGCCTGTTG-3 ′   |
|                                  | <i>CR4</i> -R1             | 5 ′CGAACGGGATCCTGCTG-3 ′                         |
|                                  | <i>CR4</i> -F2             | 5 ′ATGGACATTGTGCCTGTTG-3 ′                       |
|                                  | <i>T7-CR4</i> -R2          | 5 ′TAATACGACTCACTATAGGGCGAACGGGATCCTGCTG-3 ′     |
|                                  | <i>T7-Actin</i> -F1        | 5 ′TAATACGACTCACTATAGGGGTCAGCCACACCGTGCCAATC-3 ′ |
|                                  | <i>Actin</i> -R1           | 5 ′TGTCCTTACAATTCCCG-3 ′                         |
|                                  | <i>Actin</i> -F2           | 5 ′GTCAGCCACACCGTGCCAATC-3 ′                     |

|                       |                                  |                                                     |
|-----------------------|----------------------------------|-----------------------------------------------------|
|                       | <i>T7-Actin-R2</i>               | 5'-TAATACGACTCACTATAGGGTGTCCCTTACA<br>ATTTCCCG-3'   |
| Yeast<br>hybrid       | <i>OsGIF1</i> N p1:              | 5'-CGGAATTCATGCAGCAGCAGATG-3'                       |
|                       | <i>OsGIF1</i> N p2:              | 5'-CGGGATCCCGACATGTATTGCC-3'                        |
|                       | <i>OsGIF1</i> C p1:              | 5'-CGGAATTCCAGGTGCCAATGTTC-3'                       |
|                       | <i>OsGIF1</i> C p2:              | 5'-CGGGATCCGGATTGATCGCCG-3'                         |
|                       | <i>OsGIF2</i> N p1:              | 5'-CGGAATTCATGCAGCAGCAGCCG-3'                       |
|                       | <i>OsGIF2</i> N p2:              | 5'-CGGGATCCCCCAGCACCTGGGGTAG-3'                     |
|                       | <i>OsGIF2</i> C p1:              | 5'-CGGAATTCCATTACATGTCCCAAG-3'                      |
|                       | <i>OsGIF2</i> C p2:              | 5'-CGGGATCCTTAGGATTGATCGCC-3'                       |
|                       | <i>OsGIF3</i> N p1:              | 5'-CGGAATTCATGCAGCAGCAACAC-3'                       |
|                       | <i>OsGIF3</i> N p2:              | 5'-CGGGATCCCGCCCCGGACTGC-3'                         |
|                       | <i>OsGIF3</i> C p1:              | 5'-CGGAATTCAGGTACATGCCGCAGC-3'                      |
|                       | <i>OsGIF3</i> C p2:              | 5'-CGGGATCCCTAGCTGCCTTCCTC-3'                       |
|                       | <i>OsGRF6</i> N P1:              | 5'-CGGAATTCATGCAGGGTGCAATGGC-3'                     |
|                       | <i>OsGRF6</i> N P2:              | 5'-GCGTCGACGCCTTCCACATGCTTTC-3'                     |
|                       | <i>OsGRF6</i> C P1:              | 5'-CGGAATTCCAGCCTGGCCATGCCG-3'                      |
|                       | <i>OsGRF6</i> C P2:              | 5'-CGGGATCCCACCAGGCGGATGC-3'                        |
|                       | <i>OsGRF10</i> p1:               | 5'-CGGAATTCATGGATGAGGAGAAG-3'                       |
|                       | <i>OsGRF10</i> p2 :              | 5'-CGGGATCCGGTGGCGCGCGCGGTGCC-3'                    |
| Protein<br>expression | <i>OsGIF1</i> P1:                | 5'-CGGAATTCATGCAGCAGCAGATG-3'                       |
|                       | <i>OsGIF1</i> P2:                | 5'-GCGTCGACGGACTTCTCCGCTATG-3'                      |
|                       | <i>OsGRF6</i> N P1:              | 5'-CGGAATTCATGCAGGGTGCAATGGC-3'                     |
|                       | <i>OsGRF6</i> N P2:              | 5'-GCGTCGACGCCTTCCACATGCTTTC-3'                     |
|                       | <i>OsGRF10</i> P1:               | 5'-CGGAATTCATGGATGAGGAGAAGG-3'                      |
|                       | <i>OsGRF10</i> P2:               | 5'-GCGTCGACGGTGGCGCGCGCGGTGCCG-3'                   |
|                       | <i>OsGRF6</i> -pro-P1:           | 5'-GCGTCGACCAACCCGCACAGCGAGAG-3'                    |
|                       | <i>OsGRF6</i> -pro-P2:           | 5'-GGGGTACCGCTGCTGCTCAAGCTCACTG-3'                  |
|                       | miR396d-pro-P1:                  | 5'-GCGTCGACTTTGGGGCCCTCACAAC-3'                     |
|                       | miR396d-pro-P2:                  | 5'-GGGGTACCCGGAATTCCATGCTCTGC-3'                    |
|                       | <i>rOsGRF6</i> P1:               | 5'-GGACGCCACCGTTCTAGGAAACACGT<br>CGAAGGCCAGCCTGG-3' |
|                       | <i>rOsGRF6</i> P2:               | 5'-CCAGGCTGGCCTTCGACGTGTTTCCTAGAA<br>CGGTGGCGTCC-3' |
|                       | <i>OsGRF6</i> 1301 P1:           | 5'-CCCCCGG ATGCAGGGTG CAATG-3'                      |
|                       | <i>OsGRF6</i> 1301 P2:           | 5'-GGGGTACC TCACACCAGGCGGATG-3'                     |
| miROE-1301P1:         | 5'-CGGGATCCTGGAATTCCGGGAGTCCC-3' |                                                     |

|  |                    |                                      |
|--|--------------------|--------------------------------------|
|  | miROE-1301P2:      | 5'-GGGGTACCAAGCCACAGAAGTCAACAAACA-3' |
|  | <i>GRF6</i> as P1: | 5'-GGGGTACCATGCAGGGTGCAATGGC-3'      |
|  | <i>GRF6</i> as P2: | 5'-GAAGATCTCACCAGGCGGATGCTCGGATG-3'  |

**Supplemental Table S4.** Statistical analysis of different kinds of florets as well as expression level of *JMJ706* in miROE and miROE/*JMJ706*OE crossed plants.

| No of six independent miROE/ <i>JMJ706</i> OE crossed lines | Ratio of florets with open husks or long sterile lemmas in independent plants of miROE8 | Ratio of florets with open husks or long sterile lemmas in miROE/ <i>JMJ706</i> OE crossed lines | <i>JMJ706</i> expression levels in independent plants of <i>JMJ706</i> OE line 1 (/Ubiquitin) | <i>JMJ706</i> expression levels in crossed lines (/Ubiquitin) |
|-------------------------------------------------------------|-----------------------------------------------------------------------------------------|--------------------------------------------------------------------------------------------------|-----------------------------------------------------------------------------------------------|---------------------------------------------------------------|
| Line1                                                       | 17%                                                                                     | 8%                                                                                               | 2.50                                                                                          | 1.26                                                          |
| Line2                                                       | 16%                                                                                     | 6%                                                                                               | 2.60                                                                                          | 1.51                                                          |
| Line3                                                       | 20%                                                                                     | 10%                                                                                              | 2.28                                                                                          | 1.19                                                          |
| Line4                                                       | 15%                                                                                     | 7%                                                                                               | 2.62                                                                                          | 1.30                                                          |
| Line5                                                       | 17%                                                                                     | 9%                                                                                               | 2.39                                                                                          | 1.20                                                          |
| Line6                                                       | 19%                                                                                     | 10%                                                                                              | 2.41                                                                                          | 1.10                                                          |
| Averaged value                                              | 17.3%                                                                                   | 8.3%                                                                                             | 2.47                                                                                          | 1.26                                                          |
